# Supplementary material for: Experimental Examination of Solubility and Lipophilicity as Pharmaceutically Relevant Points of Novel Bioactive Hybrid Compounds
Source: MDPI journal article supplement (doi:10.3390/molecules27196504), 2022-10-01
Supplement: s1 [file s1]

**Supplementary Material**  
for  
**Experimental Examination of Solubility and Lipophilicity as Pharmaceutically Relevant Points of  
Novel Bioactive Hybrid Compounds**

Angelica Sharapova, Marina V. Ol'khovich, Svetlana Blokhina and German Perlovich\*

*Institute of Solution Chemistry, Russian Academy of Sciences,*

*1 Akademicheskaya Street, 153045, Ivanovo, Russia*

**Content:**

|                                                                                                                                                                                                                         |   |
|-------------------------------------------------------------------------------------------------------------------------------------------------------------------------------------------------------------------------|---|
| <b>Table S1.</b> Kinetic dependencies of solubility of compounds studied                                                                                                                                                | 2 |
| <b>Table S2.</b> Group contribution parameters and associated molar volumes of compounds studied.                                                                                                                       | 3 |
| <b>Table S3.</b> Experimental ( $x_{exp}$ ) and correlated ( $x_{cal}$ ) mole fractions of compounds studied (amorphous state) solubility in the solvents studied at different temperatures and pressure $p = 0.1$ MPa. | 3 |
| <b>Table S4.</b> Parameters of modified Apelblat and van't Hoff equations for of compounds studied (amorphous state) in the selected solvents.                                                                          | 4 |
| <b>Table S5.</b> Coefficients of empirical equation $\ln x = A - B/(1/T - 1/T_{hm})$ .                                                                                                                                  | 5 |
| <b>Figure S3.</b> Relationship of the enthalpy and entropic terms of the dissolution Gibbs energy for hybrid compounds I – III.                                                                                         |   |
| <b>Figure S1.</b> PXRD patterns of amorphous compounds I – III.                                                                                                                                                         | 6 |
| <b>Figure S2.</b> DSC curves of compounds I (A), II (B) and III (C).                                                                                                                                                    | 7 |
| <b>Table S6.</b> Density of the investigated solvents at different temperatures and pressure $p = 0.1$ MPa                                                                                                              | 8 |

**Table S1.** Kinetic dependencies of solubility of compounds studied I - III in buffer solutions.

| Buffer pH 2.0 |                       | Buffer pH 7.4 |                       |
|---------------|-----------------------|---------------|-----------------------|
| t/min         | S/mol·L <sup>-1</sup> | t/min         | S/mol·L <sup>-1</sup> |
| <b>I</b>      |                       |               |                       |
| 0             | 0                     | 0             | 0                     |
| 30            | $7.11 \cdot 10^{-4}$  | 30            | $5.86 \cdot 10^{-6}$  |
| 90            | $1.24 \cdot 10^{-3}$  | 60            | $8.68 \cdot 10^{-5}$  |
| 150           | $1.61 \cdot 10^{-3}$  | 90            | $1.13 \cdot 10^{-4}$  |
| 384           | $1.93 \cdot 10^{-3}$  | 186           | $1.22 \cdot 10^{-4}$  |
| 622           | $2.01 \cdot 10^{-3}$  | 321           | $1.23 \cdot 10^{-4}$  |
| 1440          | $2.13 \cdot 10^{-3}$  | 1400          | $1.24 \cdot 10^{-3}$  |
| 2880          | $1.98 \cdot 10^{-3}$  | 1700          | $1.24 \cdot 10^{-3}$  |
| 3180          | $1.98 \cdot 10^{-3}$  | 2880          | $1.24 \cdot 10^{-3}$  |
|               |                       | 3180          | $1.24 \cdot 10^{-3}$  |
| <b>II</b>     |                       |               |                       |
| 0             | 0                     | 0             | 0                     |
| 30            | $6.10 \cdot 10^{-4}$  | 30            | $9.153 \cdot 10^{-6}$ |
| 90            | $7.10 \cdot 10^{-4}$  | 60            | $9.611 \cdot 10^{-5}$ |
| 150           | $9.21 \cdot 10^{-4}$  | 90            | $2.002 \cdot 10^{-4}$ |
| 210           | $9.98 \cdot 10^{-4}$  | 186           | $2.971 \cdot 10^{-4}$ |
| 384           | $1.11 \cdot 10^{-3}$  | 321           | $3.383 \cdot 10^{-4}$ |
| 622           | $1.18 \cdot 10^{-3}$  | 1400          | $3.707 \cdot 10^{-4}$ |
| 1440          | $1.31 \cdot 10^{-3}$  | 2880          | $3.192 \cdot 10^{-4}$ |
| 2880          | $1.24 \cdot 10^{-3}$  | 4320          | $3.192 \cdot 10^{-4}$ |
| 4320          | $1.23 \cdot 10^{-3}$  |               |                       |
| <b>III</b>    |                       |               |                       |
| 0             | 0                     | 0             | 0                     |
| 39            | $3.43 \cdot 10^{-4}$  | 20            | $1.65 \cdot 10^{-5}$  |
| 65            | $4.20 \cdot 10^{-4}$  | 50            | $3.11 \cdot 10^{-5}$  |
| 214           | $4.80 \cdot 10^{-4}$  | 113           | $4.71 \cdot 10^{-5}$  |
| 280           | $4.89 \cdot 10^{-4}$  | 180           | $6.14 \cdot 10^{-5}$  |
| 385           | $5.07 \cdot 10^{-4}$  | 280           | $6.27 \cdot 10^{-5}$  |
| 1422          | $6.09 \cdot 10^{-4}$  | 335           | $6.34 \cdot 10^{-5}$  |
| 2682          | $6.76 \cdot 10^{-4}$  | 1350          | $6.65 \cdot 10^{-5}$  |
| 2880          | $6.78 \cdot 10^{-4}$  | 2690          | $6.73 \cdot 10^{-5}$  |
|               |                       | 2880          | $6.73 \cdot 10^{-5}$  |

**Table S2.** Group contribution parameters and associated molar volumes of compounds studied.

| Individual functional group  | Frequency | $F_{di},$<br>(J/cm <sup>3</sup> ) <sup>0.5</sup> ·mol <sup>-1</sup> | $F_{pi},$<br>(J/cm <sup>3</sup> ) <sup>0.5</sup> ·mol <sup>-1</sup> | $E_{hi},$<br>J/mol | $V_i,$<br>cm <sup>3</sup> /mol |
|------------------------------|-----------|---------------------------------------------------------------------|---------------------------------------------------------------------|--------------------|--------------------------------|
| <b>I</b>                     |           |                                                                     |                                                                     |                    |                                |
| -F                           | 2         | 102.0                                                               | 493.9                                                               | 6544.3             | 18.0                           |
| =CH-                         | 10        | 255.0                                                               | 38                                                                  | 0                  | 13.5                           |
| -CH <sub>2</sub> -           | 9         | 234.6                                                               | 0                                                                   | 0                  | 16.1                           |
| >C<                          | 1         | -214.2                                                              | 0                                                                   | 0                  | -19.2                          |
| -OH                          | 1         | 76.5                                                                | 1225.0                                                              | 6060.0             | 10.0                           |
| -CO-                         | 1         | 105                                                                 | 600.0                                                               | 9500.0             | 10.8                           |
| -CH <sub>3</sub>             | 1         | 336.6                                                               | 0                                                                   | 0                  | 33.5                           |
| -S-                          | 2         | 815.9                                                               | 196.0                                                               | 297.5              | 12.0                           |
| =C<                          | 7         | 56.7                                                                | 2.00                                                                | 0                  | 5.5                            |
| -N=                          | 3         | 380                                                                 | 100                                                                 | 250                | 5.0                            |
| >N-                          | 5         | 30                                                                  | 150.0                                                               | 750.0              | -9                             |
| Ring closure 5 or more atoms | 4         | 142.8                                                               | 0                                                                   | 0                  | 16                             |
| Phenylene                    | 2         | 1173.0                                                              | 63.7                                                                | 40.4               | 52.4                           |
| Double bond                  | 12        | 15.0                                                                | 14.3                                                                | 83.5               | 2.2                            |
| <b>II</b>                    |           |                                                                     |                                                                     |                    |                                |
| -F                           | 3         | 102.0                                                               | 493.9                                                               | 6544.3             | 18.0                           |
| =CH-                         | 10        | 255.0                                                               | 38                                                                  | 0                  | 13.5                           |
| -CH <sub>2</sub> -           | 9         | 234.6                                                               | 0                                                                   | 0                  | 16.1                           |
| >C<                          | 1         | -214.2                                                              | 0                                                                   | 0                  | -19.2                          |
| -OH                          | 1         | 76.5                                                                | 1225.0                                                              | 6060.0             | 10.0                           |
| -CO-                         | 1         | 105                                                                 | 600.0                                                               | 9500.0             | 10.8                           |
| -S-                          | 2         | 815.9                                                               | 196.0                                                               | 297.5              | 12.0                           |
| =C<                          | 7         | 56.7                                                                | 2.00                                                                | 0                  | 5.5                            |
| -N=                          | 3         | 380                                                                 | 100                                                                 | 250                | 5.0                            |
| >N-                          | 5         | 30                                                                  | 150.0                                                               | 750.0              | -9                             |
| Ring closure 5 or more atoms | 4         | 142.8                                                               | 0                                                                   | 0                  | 16                             |
| Phenylene                    | 2         | 1173.0                                                              | 63.7                                                                | 40.4               | 52.4                           |
| Double bond                  | 12        | 15.0                                                                | 14.3                                                                | 83.5               | 2.2                            |
| <b>III</b>                   |           |                                                                     |                                                                     |                    |                                |
| -F                           | 2         | 102.0                                                               | 493.9                                                               | 6544.3             | 18.0                           |
| =CH-                         | 10        | 255.0                                                               | 38                                                                  | 0                  | 13.5                           |
| -CH <sub>2</sub> -           | 9         | 234.6                                                               | 0                                                                   | 0                  | 16.1                           |
| >C<                          | 3         | -214.2                                                              | 0                                                                   | 0                  | -19.2                          |
| -OH                          | 1         | 76.5                                                                | 1225.0                                                              | 6060.0             | 10.0                           |
| -CO-                         | 1         | 105                                                                 | 600.0                                                               | 9500.0             | 10.8                           |
| -Cl                          | 1         | 397.8                                                               | 1477.2                                                              | 4706.0             | 26.0                           |
| -S-                          | 2         | 815.9                                                               | 196.0                                                               | 297.5              | 12.0                           |
| =C<                          | 7         | 56.7                                                                | 2.00                                                                | 0                  | 5.5                            |
| -N=                          | 3         | 380                                                                 | 100                                                                 | 250                | 5.0                            |
| >N-                          | 5         | 30                                                                  | 150.0                                                               | 750.0              | -9                             |
| Ring closure 5 or more atoms | 4         | 142.8                                                               | 0                                                                   | 0                  | 16                             |
| Phenylene                    | 2         | 1173.0                                                              | 63.7                                                                | 40.4               | 52.4                           |
| Double bond                  | 12        | 15.0                                                                | 14.3                                                                | 83.5               | 2.2                            |

**Table S3.** Experimental ( $x_{exp}$ ) and correlated ( $x_{cal}$ ) mole fractions of compounds studied (amorphous state) solubility in the solvents studied at different temperatures and pressure  $p = 0.1$  MPa.

| Solubility in the solvents studied at different temperatures and pressure $p = 0.1$ MPa |                         |                            |           |                         |         |
|-----------------------------------------------------------------------------------------|-------------------------|----------------------------|-----------|-------------------------|---------|
| $T/K$                                                                                   | $x_{exp}$               | Modified Apelblat equation |           | van't Hoff equation     |         |
|                                                                                         |                         | $x_{cal}$                  | $^a100RD$ | $x_{cal}$               | $100RD$ |
| I                                                                                       |                         |                            |           |                         |         |
| $^b$ Buffer pH 2.0                                                                      |                         |                            |           |                         |         |
| 293.15                                                                                  | $3.3040 \cdot 10^{-5}$  | $3.3041 \cdot 10^{-5}$     | -0.0016   | $3.2958 \cdot 10^{-5}$  | 0.2490  |
| 298.15                                                                                  | $3.5732 \cdot 10^{-5}$  | $3.5701 \cdot 10^{-5}$     | 0.0812    | $3.5770 \cdot 10^{-5}$  | -0.1117 |
| 303.15                                                                                  | $3.8570 \cdot 10^{-5}$  | $3.8591 \cdot 10^{-5}$     | -0.0549   | $3.8717 \cdot 10^{-5}$  | -0.3822 |
| 308.15                                                                                  | $4.1749 \cdot 10^{-5}$  | $4.1729 \cdot 10^{-5}$     | 0.0510    | $4.1800 \cdot 10^{-5}$  | -0.1195 |
| 313.15                                                                                  | $4.5144 \cdot 10^{-5}$  | $4.5134 \cdot 10^{-5}$     | 0.0139    | $4.5018 \cdot 10^{-5}$  | 0.2709  |
| $^c$ Buffer pH 7.4                                                                      |                         |                            |           |                         |         |
| 293.15                                                                                  | $2.0541 \cdot 10^{-6}$  | $2.0571 \cdot 10^{-6}$     | -0.1443   | $2.0596 \cdot 10^{-6}$  | -0.2687 |
| 298.15                                                                                  | $2.2653 \cdot 10^{-6}$  | $2.2581 \cdot 10^{-6}$     | 0.3187    | $2.2563 \cdot 10^{-6}$  | 0.3991  |
| 303.15                                                                                  | $2.4636 \cdot 10^{-6}$  | $2.4678 \cdot 10^{-6}$     | -0.1689   | $2.4643 \cdot 10^{-6}$  | -0.0264 |
| 308.15                                                                                  | $2.6820 \cdot 10^{-6}$  | $2.6856 \cdot 10^{-6}$     | -0.1347   | $2.6837 \cdot 10^{-6}$  | -0.0643 |
| 313.15                                                                                  | $2.9135 \cdot 10^{-6}$  | $2.9111 \cdot 10^{-6}$     | 0.0827    | $2.9148 \cdot 10^{-6}$  | -0.0443 |
| 1-Octanol                                                                               |                         |                            |           |                         |         |
| 293.15                                                                                  | $1.1199 \cdot 10^{-3}$  | $1.1199 \cdot 10^{-3}$     | 0.0057    | $1.1174 \cdot 10^{-3}$  | 0.2292  |
| 298.15                                                                                  | $1.1981 \cdot 10^{-3}$  | $1.2015 \cdot 10^{-3}$     | -0.1285   | $1.2023 \cdot 10^{-3}$  | -0.1926 |
| 303.15                                                                                  | $1.2903 \cdot 10^{-3}$  | $1.2886 \cdot 10^{-3}$     | 0.1103    | $1.2905 \cdot 10^{-3}$  | -0.0408 |
| 308.15                                                                                  | $1.3835 \cdot 10^{-3}$  | $1.3813 \cdot 10^{-3}$     | -0.0970   | $1.3820 \cdot 10^{-3}$  | -0.1474 |
| 313.15                                                                                  | $1.4834 \cdot 10^{-3}$  | $1.4801 \cdot 10^{-3}$     | -0.0092   | $1.4768 \cdot 10^{-3}$  | 0.2166  |
| II                                                                                      |                         |                            |           |                         |         |
| Buffer pH 2.0 <sup>a</sup>                                                              |                         |                            |           |                         |         |
| 293.15                                                                                  | $1.9402 \cdot 10^{-5}$  | $1.9362 \cdot 10^{-5}$     | 0.1958    | $1.9383 \cdot 10^{-5}$  | 0.0895  |
| 298.15                                                                                  | $2.2272 \cdot 10^{-5}$  | $2.2392 \cdot 10^{-5}$     | -0.5471   | $2.2374 \cdot 10^{-5}$  | -0.466  |
| 303.15                                                                                  | $2.5822 \cdot 10^{-5}$  | $2.5740 \cdot 10^{-5}$     | 0.3105    | $2.5705 \cdot 10^{-5}$  | 0.4471  |
| 308.15                                                                                  | $2.9451 \cdot 10^{-5}$  | $2.9419 \cdot 10^{-5}$     | 0.1034    | $2.9399 \cdot 10^{-5}$  | 0.1743  |
| 313.15                                                                                  | $3.3404 \cdot 10^{-5}$  | $3.3443 \cdot 10^{-5}$     | -0.1278   | $3.3480 \cdot 10^{-5}$  | -0.2376 |
| Buffer pH 7.4 <sup>b</sup>                                                              |                         |                            |           |                         |         |
| 293.15                                                                                  | $5.4794 \cdot 10^{-6}$  | $5.4776 \cdot 10^{-6}$     | 0.0327    | $5.4811 \cdot 10^{-6}$  | -0.0301 |
| 298.15                                                                                  | $5.8122 \cdot 10^{-6}$  | $5.8117 \cdot 10^{-6}$     | 0.0093    | $5.8129 \cdot 10^{-6}$  | -0.0129 |
| 303.15                                                                                  | $6.1623 \cdot 10^{-6}$  | $6.1524 \cdot 10^{-6}$     | 0.1607    | $6.1530 \cdot 10^{-6}$  | 0.1509  |
| 308.15                                                                                  | $6.4929 \cdot 10^{-6}$  | $6.4994 \cdot 10^{-6}$     | -0.0998   | $6.5009 \cdot 10^{-6}$  | -0.1238 |
| 313.15                                                                                  | $6.8581 \cdot 10^{-6}$  | $6.8522 \cdot 10^{-6}$     | 0.0864    | $6.8565 \cdot 10^{-6}$  | 0.0234  |
| 1-Octanol                                                                               |                         |                            |           |                         |         |
| 293.15                                                                                  | $8.5358 \cdot 10^{-4}$  | $8.5503 \cdot 10^{-4}$     | -0.1679   | $8.5505 \cdot 10^{-4}$  | -0.1703 |
| 298.15                                                                                  | $9.0027 \cdot 10^{-4}$  | $8.9701 \cdot 10^{-4}$     | 0.3655    | $8.9678 \cdot 10^{-4}$  | 0.3908  |
| 303.15                                                                                  | $9.3813 \cdot 10^{-4}$  | $9.9339 \cdot 10^{-4}$     | -0.1371   | $9.3908 \cdot 10^{-4}$  | -0.1036 |
| 308.15                                                                                  | $9.8001 \cdot 10^{-4}$  | $9.8212 \cdot 10^{-4}$     | -0.2166   | $9.8189 \cdot 10^{-4}$  | -0.1933 |
| 313.15                                                                                  | $10.2644 \cdot 10^{-4}$ | $10.2520 \cdot 10^{-4}$    | 0.1249    | $10.2520 \cdot 10^{-4}$ | 0.1206  |
| III                                                                                     |                         |                            |           |                         |         |
| Buffer pH 2.0 <sup>a</sup>                                                              |                         |                            |           |                         |         |
| 293.15                                                                                  | $1.1474 \cdot 10^{-5}$  | $1.1471 \cdot 10^{-5}$     | -0.0057   | $1.1503 \cdot 10^{-5}$  | -0.289  |
| 298.15                                                                                  | $1.2247 \cdot 10^{-5}$  | $1.2242 \cdot 10^{-5}$     | 0.0622    | $1.2225 \cdot 10^{-5}$  | 0.2079  |
| 303.15                                                                                  | $1.3013 \cdot 10^{-5}$  | $1.3001 \cdot 10^{-5}$     | 0.0692    | $1.2965 \cdot 10^{-5}$  | 0.3438  |
| 308.15                                                                                  | $1.3731 \cdot 10^{-5}$  | $1.3742 \cdot 10^{-5}$     | -0.0855   | $1.3725 \cdot 10^{-5}$  | 0.0387  |
| 313.15                                                                                  | $1.4468 \cdot 10^{-5}$  | $1.4460 \cdot 10^{-5}$     | 0.0681    | $1.4502 \cdot 10^{-5}$  | -0.2216 |
| Buffer pH 7.4 <sup>b</sup>                                                              |                         |                            |           |                         |         |

|        |                        |                        |         |                        |         |
|--------|------------------------|------------------------|---------|------------------------|---------|
| 293.15 | $1.0651 \cdot 10^{-6}$ | $1.0639 \cdot 10^{-6}$ | 0.1126  | $1.0603 \cdot 10^{-6}$ | 0.4462  |
| 298.15 | $1.2262 \cdot 10^{-6}$ | $1.2290 \cdot 10^{-6}$ | -0.2310 | $1.2312 \cdot 10^{-6}$ | -0.4108 |
| 303.15 | $1.4201 \cdot 10^{-6}$ | $1.4179 \cdot 10^{-6}$ | 0.1558  | $1.4226 \cdot 10^{-6}$ | -0.1788 |
| 308.15 | $1.6349 \cdot 10^{-6}$ | $1.6336 \cdot 10^{-6}$ | 0.0808  | $1.6361 \cdot 10^{-6}$ | -0.0738 |
| 313.15 | $1.8788 \cdot 10^{-6}$ | $1.8796 \cdot 10^{-6}$ | -0.0421 | $1.8732 \cdot 10^{-6}$ | 0.2969  |

#### 1-Octanol

|        |                        |                        |         |                        |        |
|--------|------------------------|------------------------|---------|------------------------|--------|
| 293.15 | $1.7767 \cdot 10^{-3}$ | $1.7753 \cdot 10^{-3}$ | 0.0802  | $1.7736 \cdot 10^{-3}$ | 0.1733 |
| 298.15 | $1.9566 \cdot 10^{-3}$ | $1.9588 \cdot 10^{-3}$ | -0.1167 | $1.9603 \cdot 10^{-3}$ | -0.192 |
| 303.15 | $2.1577 \cdot 10^{-3}$ | $2.1568 \cdot 10^{-3}$ | 0.0421  | $2.1595 \cdot 10^{-3}$ | -0.084 |
| 308.15 | $2.3729 \cdot 10^{-3}$ | $2.3699 \cdot 10^{-3}$ | 0.1258  | $2.3715 \cdot 10^{-3}$ | 0.059  |
| 313.15 | $2.5979 \cdot 10^{-3}$ | $2.5990 \cdot 10^{-3}$ | -0.0415 | $2.5965 \cdot 10^{-3}$ | 0.0539 |

<sup>a</sup> $RD$  is the relative deviation:  $RD = (x_{exp} - x_{cal})/x_{exp}$

<sup>b</sup>Composition of aqueous buffer pH 2.0: KCl (6.57 g in 1 L) and 0.1 mol/dm<sup>3</sup> hydrochloric acid (119.0 mL in 1 L)

<sup>c</sup>Composition of aqueous buffer pH 7.4: KH<sub>2</sub>PO<sub>4</sub> (9.1 g in 1 L) and Na<sub>2</sub>HPO<sub>4</sub>·12H<sub>2</sub>O (23.6 g in 1 L)  
Standard uncertainties:  $u(T) = 0.15$  K and  $u(p) = 3$  kPa.

Relative standard uncertainties for solubility:  $u_r(x) = 0.045$  for buffer solutions and  $u_r(x) = 0.04$  for 1-octanol.

**Table S4.** Parameters of modified Apelblat and van't Hoff equations for of compounds studied (amorphous state) in the selected solvents.

| Solvents                   | <i>A</i> | <i>B</i> | <i>C</i> | <i>RMSD</i>          | 100 <i>RAD</i> |
|----------------------------|----------|----------|----------|----------------------|----------------|
| <b>I</b>                   |          |          |          |                      |                |
| Modified Apelblat equation |          |          |          |                      |                |
| Buffer pH 2.0              | -77.11   | -1802.3  | 10.67    | $1.89 \cdot 10^{-8}$ | 0.04           |
| Buffer pH 7.4              | 25.42    | -3086.4  | -4.93    | $4.41 \cdot 10^{-9}$ | 0.14           |
| 1-Octanol                  | -48.82   | 813.3    | 6.91     | $1.11 \cdot 10^{-6}$ | 0.07           |
| van't Hoff equation        |          |          |          |                      |                |
| Buffer pH 2.0              | -5.44    | -1431.3  | -        | $9.75 \cdot 10^{-8}$ | 0.23           |
| Buffer pH 7.4              | -7.66    | -1594.0  | -        | $4.84 \cdot 10^{-9}$ | 0.16           |
| 1-Octanol                  | -2.43    | -1279.9  | -        | $2.31 \cdot 10^{-6}$ | 0.17           |
| <b>II</b>                  |          |          |          |                      |                |
| Modified Apelblat equation |          |          |          |                      |                |
| Buffer pH 2.0              | 27.96    | -3873.5  | -4.51    | $7.14 \cdot 10^{-8}$ | 0.26           |
| Buffer pH 7.4              | -2.05    | -1323.5  | -0.98    | $5.98 \cdot 10^{-9}$ | 0.08           |
| 1-Octanol                  | 0.32     | -1038.0  | -0.68    | $2.03 \cdot 10^{-6}$ | 0.08           |
| van't Hoff equation        |          |          |          |                      |                |
| Buffer pH 2.0              | -2.29    | -2508.7  | -        | $3.65 \cdot 10^{-8}$ | 0.28           |
| Buffer pH 7.4              | -8.61    | -1027.7  | -        | $5.60 \cdot 10^{-9}$ | 0.07           |
| 1-Octanol                  | -4.22    | -833.0   | -        | $2.03 \cdot 10^{-5}$ | 0.19           |
| <b>III</b>                 |          |          |          |                      |                |
| Modified Apelblat equation |          |          |          |                      |                |
| Buffer pH 2.0              | 61.53    | -4188.7  | -10.32   | $9.71 \cdot 10^{-9}$ | 0.06           |
| Buffer pH 7.4              | -87.71   | -1126.9  | 12.34    | $1.86 \cdot 10^{-9}$ | 0.12           |
| 1-Octanol                  | -27.56   | 522.4    | 4.05     | $1.90 \cdot 10^{-6}$ | 0.07           |
| van't Hoff equation        |          |          |          |                      |                |
| Buffer pH 2.0              | -7.74    | -1063.4  | -        | $3.10 \cdot 10^{-8}$ | 0.22           |
| Buffer pH 7.4              | -4.85    | -2612.0  | -        | $4.17 \cdot 10^{-9}$ | 0.28           |
| 1-Octanol                  | -0.37    | -1749.5  | -        | $2.48 \cdot 10^{-6}$ | 0.11           |

**Table S5.** Coefficients of empirical equation  $\ln x = A - B/(1/T - 1/T_{hm})$ .

| Compound      | A                 | B             | R      |
|---------------|-------------------|---------------|--------|
| Buffer pH 2.0 |                   |               |        |
| I             | $-10.16 \pm 0.01$ | $1431 \pm 18$ | 0.9997 |
| II            | $-10.57 \pm 0.01$ | $2509 \pm 23$ | 0.9999 |
| III           | $-11.26 \pm 0.01$ | $1063 \pm 18$ | 0.9996 |
| Buffer pH 7.4 |                   |               |        |
| I             | $-12.92 \pm 0.01$ | $1594 \pm 16$ | 0.9998 |
| II            | $-12.00 \pm 0.01$ | $1028 \pm 6$  | 0.9999 |
| III           | $-13.47 \pm 0.01$ | $2612 \pm 23$ | 0.9999 |
| 1-Octanol     |                   |               |        |
| I             | $-6.66 \pm 0.01$  | $1280 \pm 13$ | 0.9998 |
| II            | $-6.97 \pm 0.01$  | $833 \pm 17$  | 0.9994 |
| III           | $-6.14 \pm 0.01$  | $1749 \pm 9$  | 0.9998 |

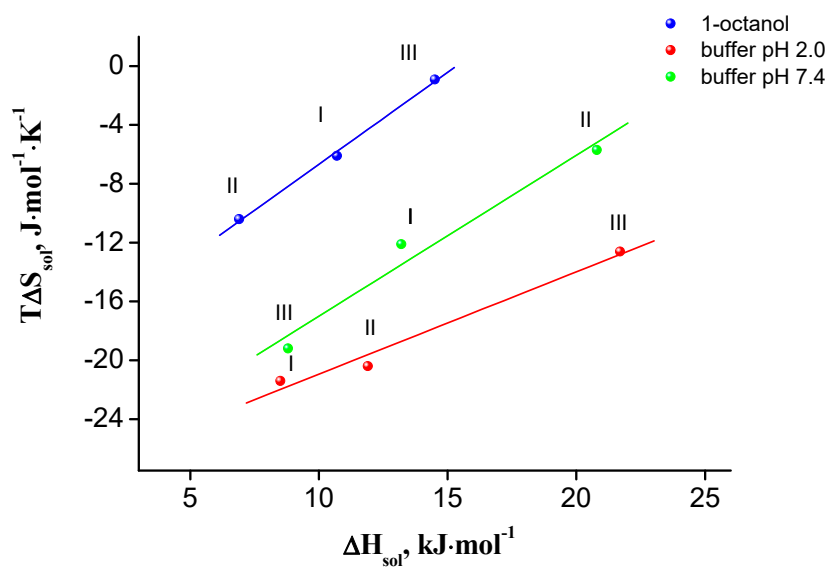**Figure S1.** Relationship of the enthalpy and entropic terms of the dissolution Gibbs energy for hybrid compounds I - III in selected solvents.

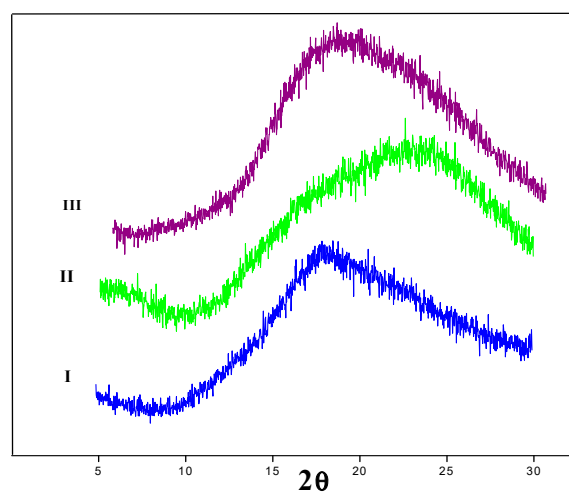

**Figure S2.** PXRD patterns of amorphous compounds I - III.

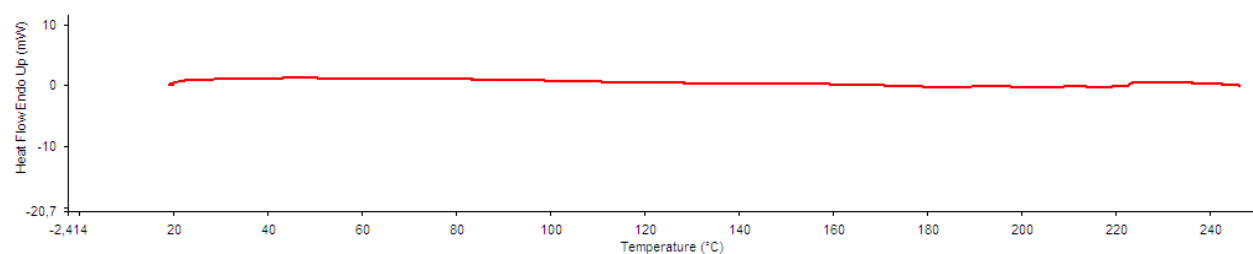

A

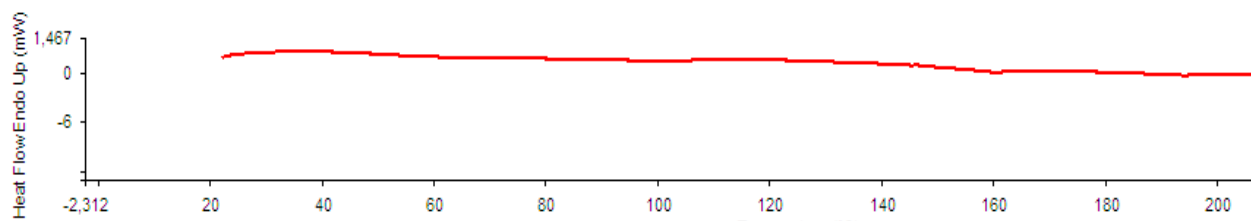

B

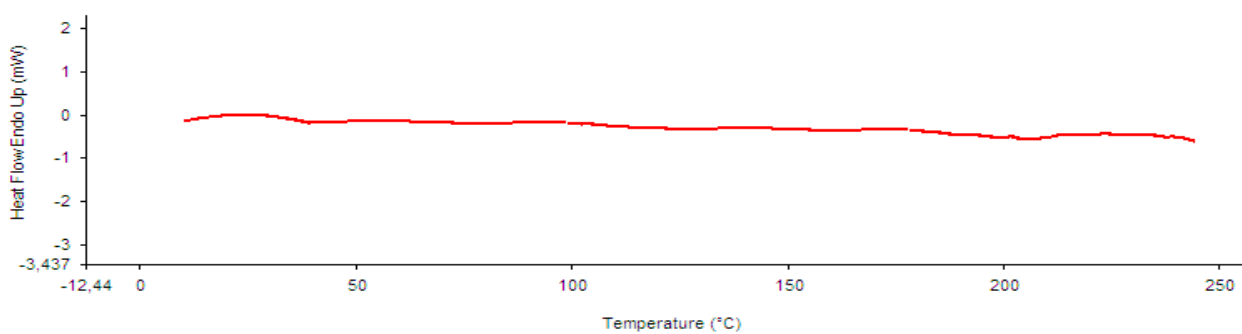

C

**Figure S3.** DSC curves of compounds I (A), II (B) and III (C).

**Table S6.** Density of the investigated solvents at different temperatures and pressure  $p = 0.1$  MPa <sup>a</sup>.

| Solvent                    | $\rho/\text{g}\cdot\text{cm}^{-3}$ |          |          |          |          |
|----------------------------|------------------------------------|----------|----------|----------|----------|
|                            | 293.15 K                           | 298.15 K | 303.15 K | 308.15 K | 313.15 K |
| Buffer pH 2.0 <sup>b</sup> | 1.0035                             | 1.0023   | 1.0008   | 0.9992   | 0.9973   |
| Buffer pH 7.4 <sup>c</sup> | 1.0060                             | 1.0048   | 1.0033   | 1.0016   | 0.9998   |
| 1-Octanol                  | 0.8251                             | 0.8217   | 0.8183   | 0.8148   | 0.8114   |

<sup>a</sup>Density data for all solvents were taken from Ref. [S. Blokhina, A. Sharapova, M. Ol'khovich, G. Perlovich, A thermodynamic study of sublimation, dissolution and distribution processes of anti-inflammatory drug Clonixin, J. Chem. Thermodyn. 132 (2019) 281–288.]

<sup>b</sup>Composition of aqueous buffer pH 2.0: KCl (6.57 g in 1 l) and 0.1 mol/dm<sup>3</sup> hydrochloric acid (119.0 ml in 1 l);

<sup>c</sup>Composition of aqueous buffer pH 7.4: KH<sub>2</sub>PO<sub>4</sub> (9.1 g in 1 l) and Na<sub>2</sub>HPO<sub>4</sub>·12H<sub>2</sub>O (23.6 g in 1 l);  
Standard uncertainties:  $u(m)=0.01$  mg,  $u(T) = 0.15$  K,  $u(p) = 3$  kPa and  $u(\rho)= 0.002$  g·cm<sup>-3</sup>.
